# Supplementary material for: NF-kappaB P50/P65 hetero-dimer mediates differential regulation of CD166/ALCAM expression via interaction with micoRNA-9 after serum deprivation, providing evidence for a novel negative auto-regulatory loop
Source: PubMed Central journal article supplement — Nucleic Acids Res. 2011 May 13;39(15):6440–55. doi: 10.1093/nar/gkr302 (PMC3159468; doi:10.1093/nar/gkr302), 2011-05-13
Supplement: supp_gkr302_CD166-Supplementary_Figure1.pdf [file supp_gkr302_CD166-Supplementary_Figure1.pdf]

Figure. S1

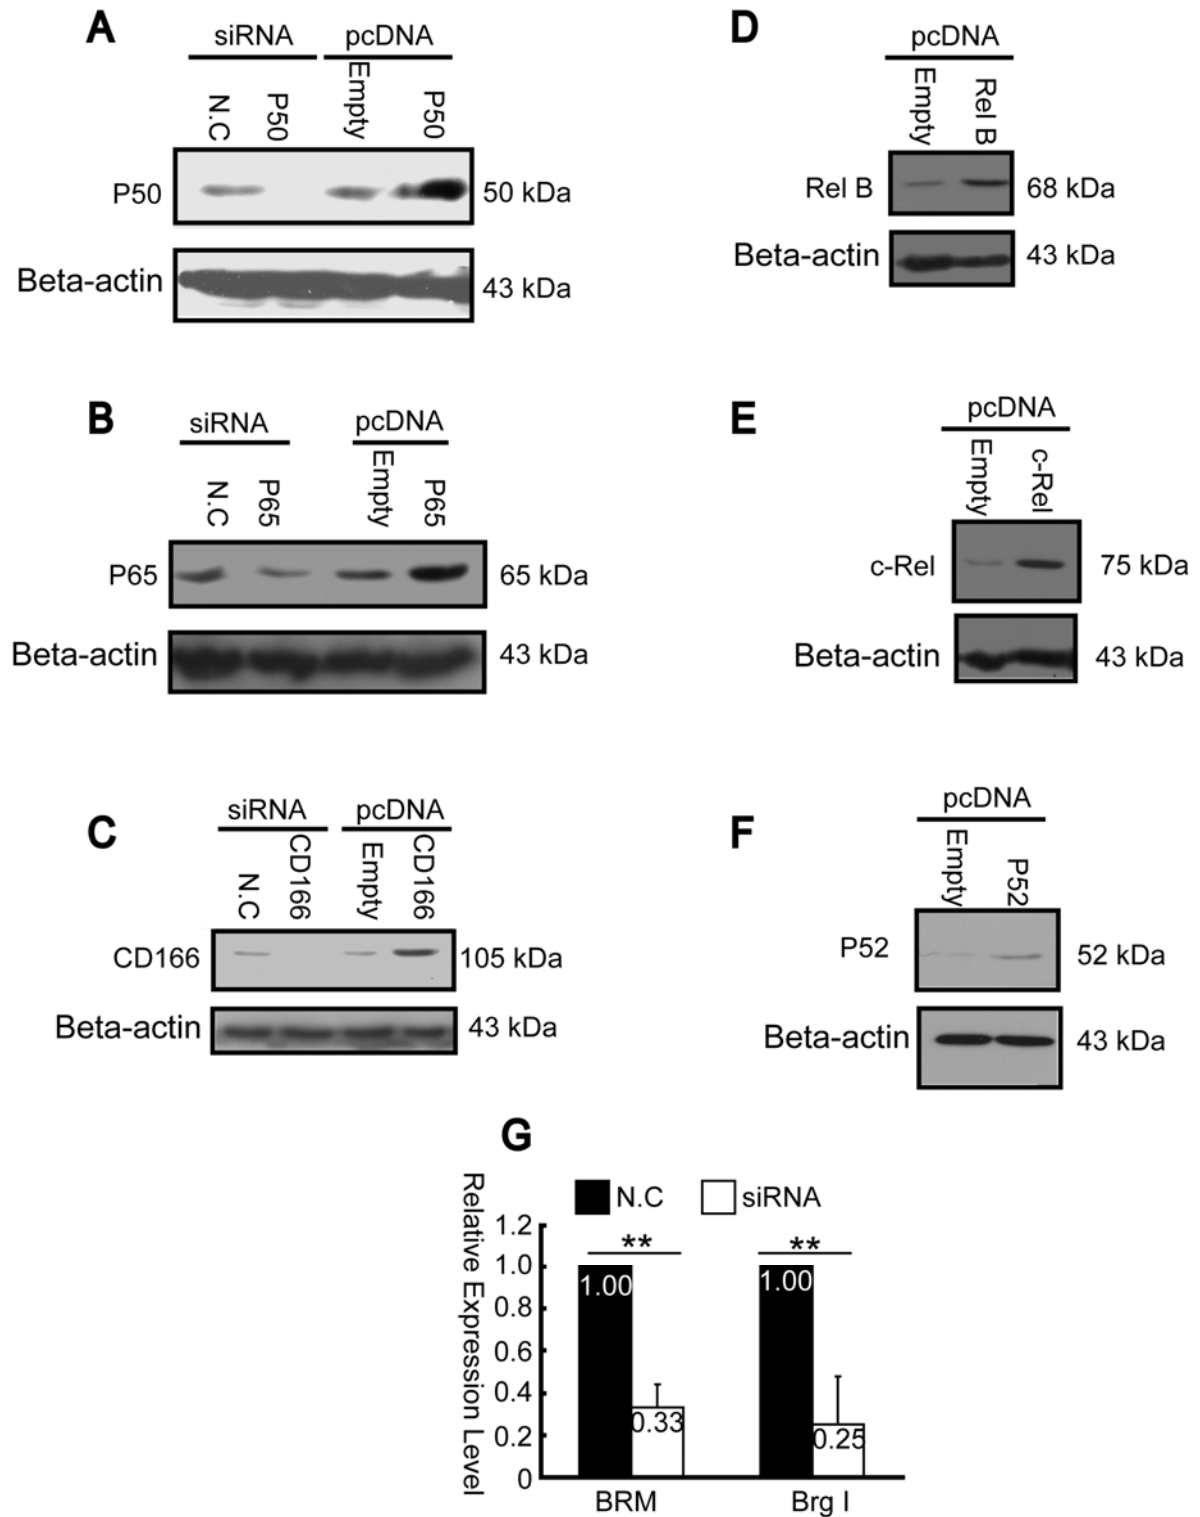

Figure legends to Figure. S1. Certification of siRNA or expression vectors. Deregulations of protein factors were verified by western blotting assay to P50 (A), P65 (B), CD166 (C), Rel B (D), c-Rel (E), and P52 (F). (G) Real-time PCR was performed to verify knockdown effects by specific siRNA against either BRM or Brg I. Beta-actin was treated as an internal control (A-G). The asterisk indicates a significant difference (\*\*,  $P < 0.01$ ).
