# Supplementary material for: NF-kappaB P50/P65 hetero-dimer mediates differential regulation of CD166/ALCAM expression via interaction with micoRNA-9 after serum deprivation, providing evidence for a novel negative auto-regulatory loop
Source: PubMed Central journal article supplement — Nucleic Acids Res. 2011 May 13;39(15):6440–55. doi: 10.1093/nar/gkr302 (PMC3159468; doi:10.1093/nar/gkr302), 2011-05-13
Supplement: supp_gkr302_CD166-Supplementary_Figure2.pdf [file supp_gkr302_CD166-Supplementary_Figure2.pdf]

Figure. S2

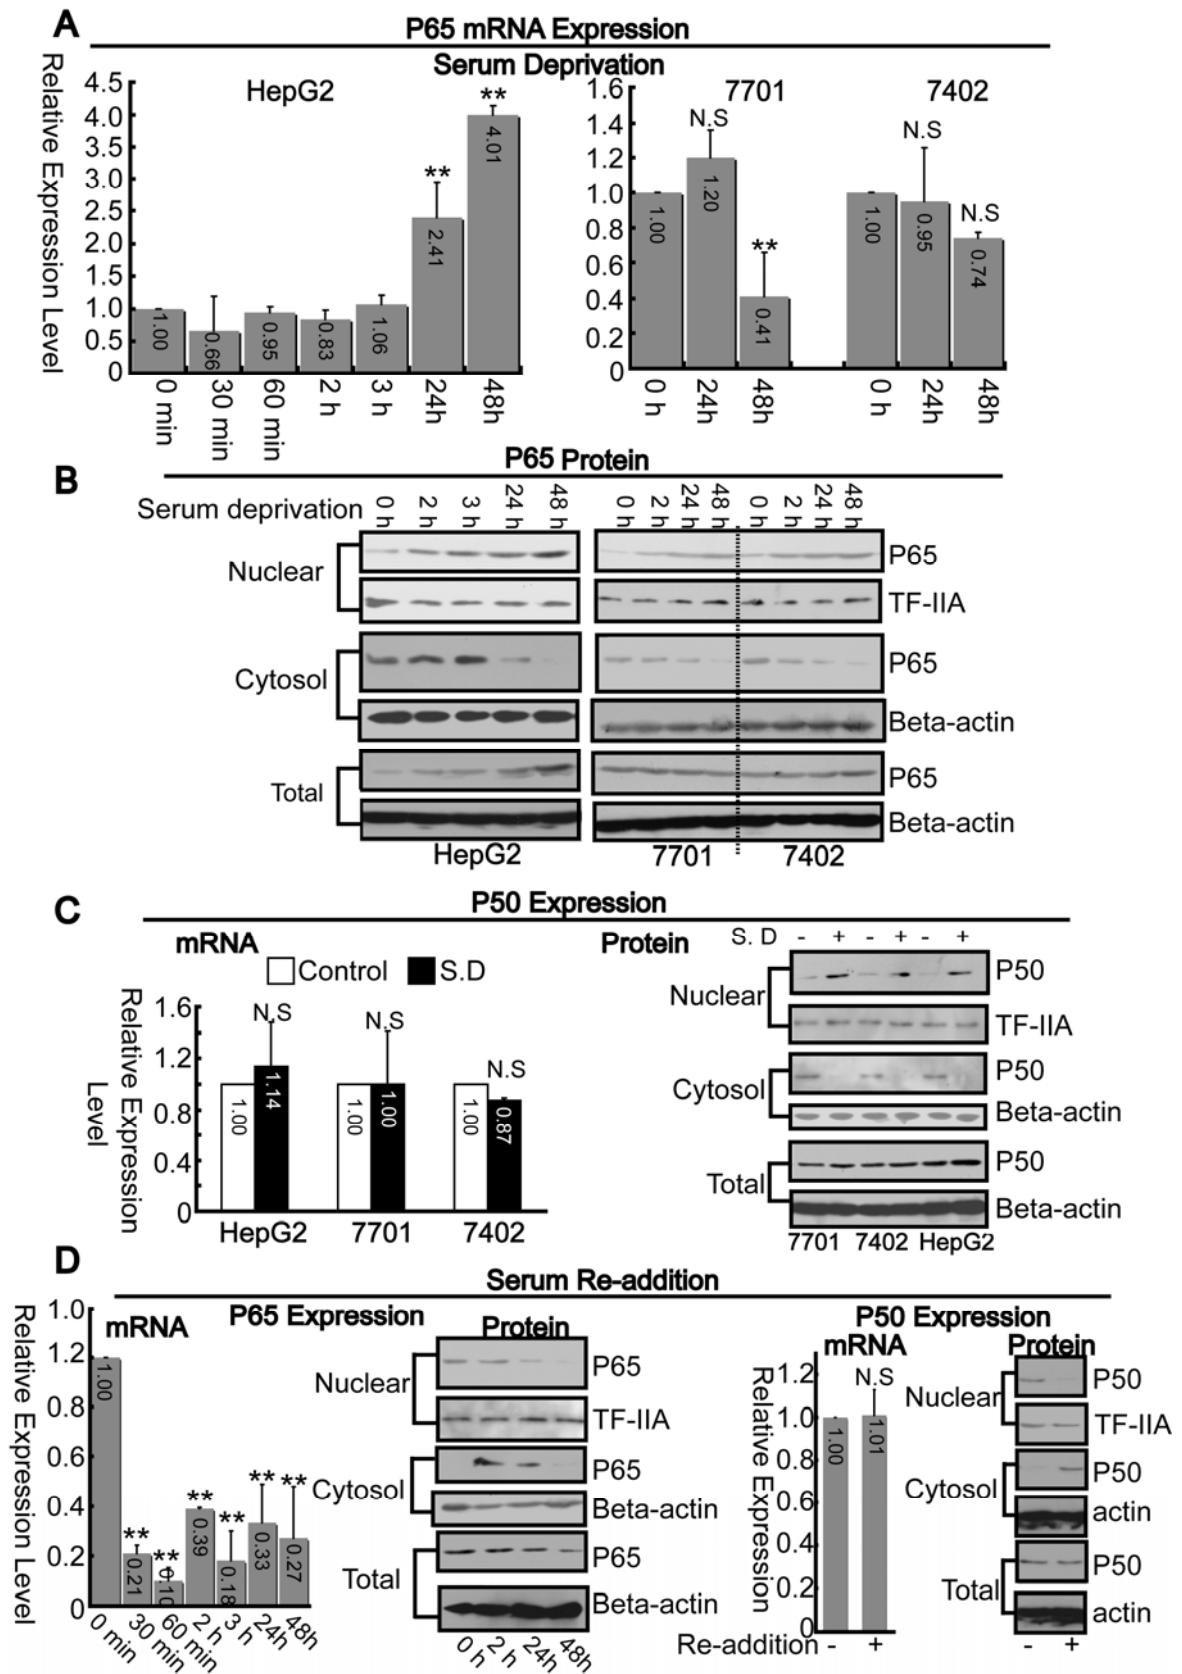

Figure Legends to **Figure. S2**:

Activation and translocation of P50/P65 induced by serum deprivation. (A) P65 mRNA expression levels were detected by real-time PCR at different time point as indicated after serum deprivation. \*\*,  $p < 0.01$  versus '0' point. (B) Whole cell lysates and fractions from cytoplasm or nuclear were then blotted against P65 respectively.  $\beta$ -actin (for total protein and cytoplasmic fractions) and TFIIA- $\alpha$  (for nuclear fractions) were used to control equal loading of samples. (C) Both mRNA and protein expression levels of P50 were measured by real-time PCR and Western blotting assay respectively. N.S., non-significance versus control. (D) Expression of P65 and P50 in HepG2 cells were measured again after re-addition of FBS (pretreated with serum deprivation for 48 h) at different time point. \*\*,  $p < 0.01$  versus '0 min' and N.S., non-significance versus control.
